# Supplementary material for: ASPP1/2-PP1 complexes are required for chromosome segregation and kinetochore-microtubule attachments
Source: PubMed Central journal article supplement (PMC4747173; doi:10.18632/oncotarget.6355), 2015-11-22
Supplement: oncotarget-06-41550-s001.pdf [file oncotarget-06-41550-s001.pdf]

# ASPP1/2-PP1 complexes are required for chromosome segregation and kinetochore-microtubule attachments

## Supplementary Material

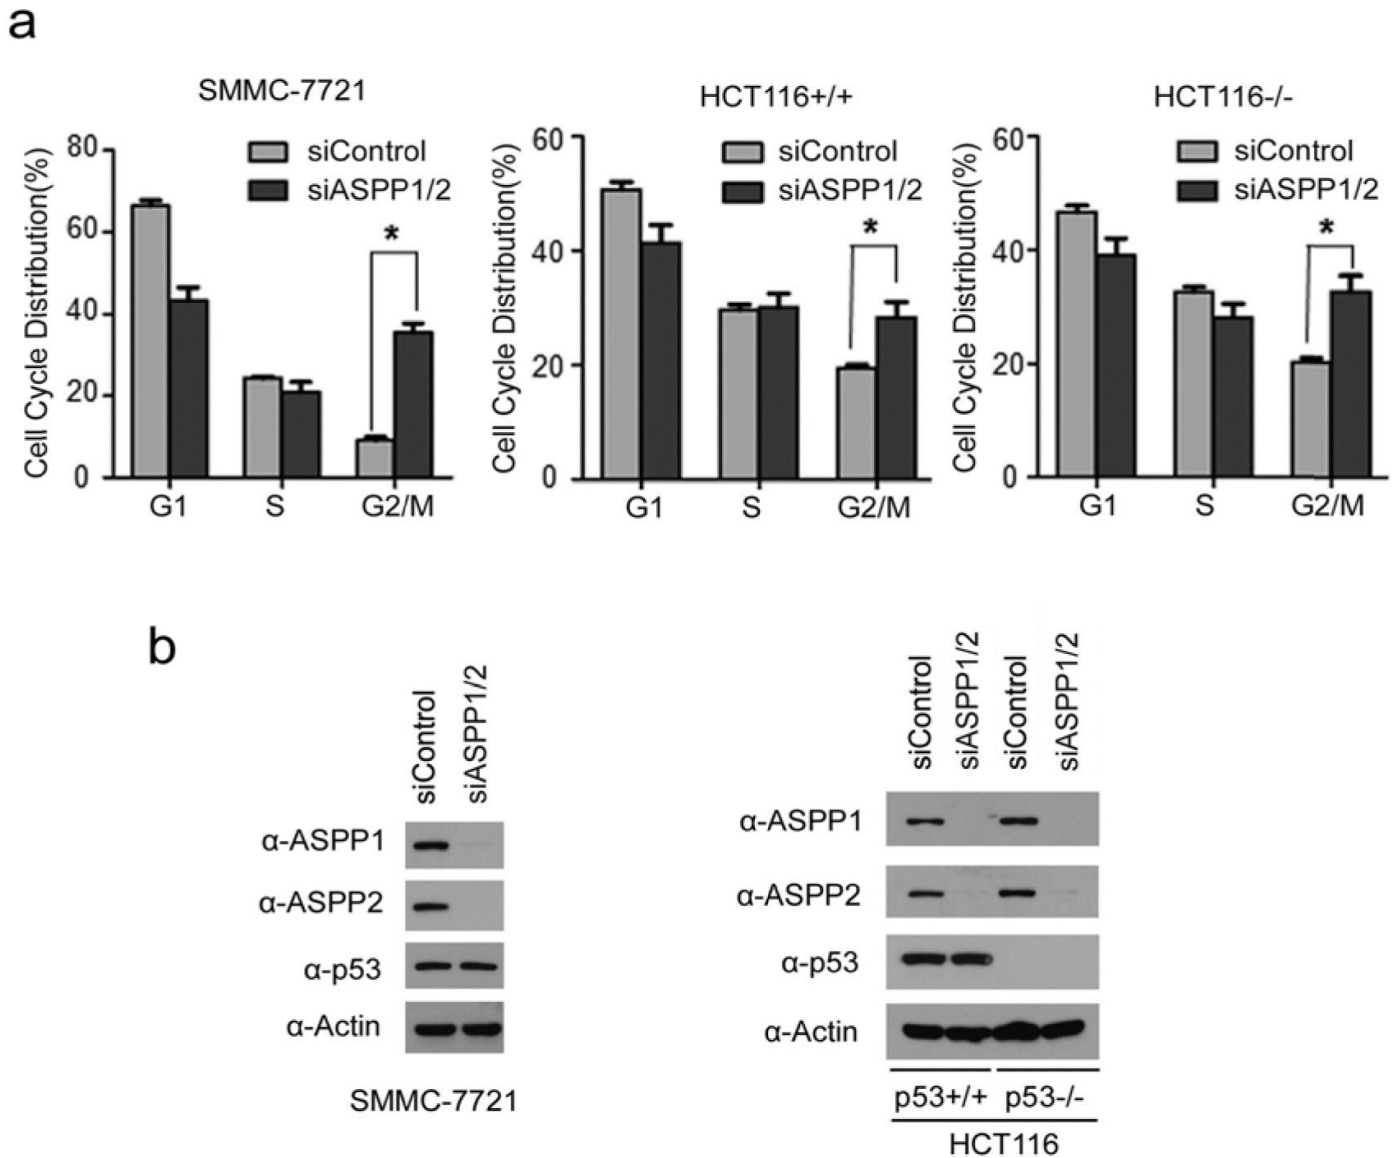

**Figure S1.** ASPP1/2 co-depletion causes G2/M arrest in p53 wild-type and null cells. **(a)** The cell-cycle distributions of SMMC-7721, HCT116 p53<sup>+/+</sup> and HCT116 p53<sup>-/-</sup> cells transfected with the indicated siRNAs for 48 hr were determined by flow cytometry. Error bars, SEM. \*p<0.01 from triplicates. **(b)** WB analyses of the cell lysates prepared from control and ASPP1/2 co-depleted HeLa cells with indicated antibodies.

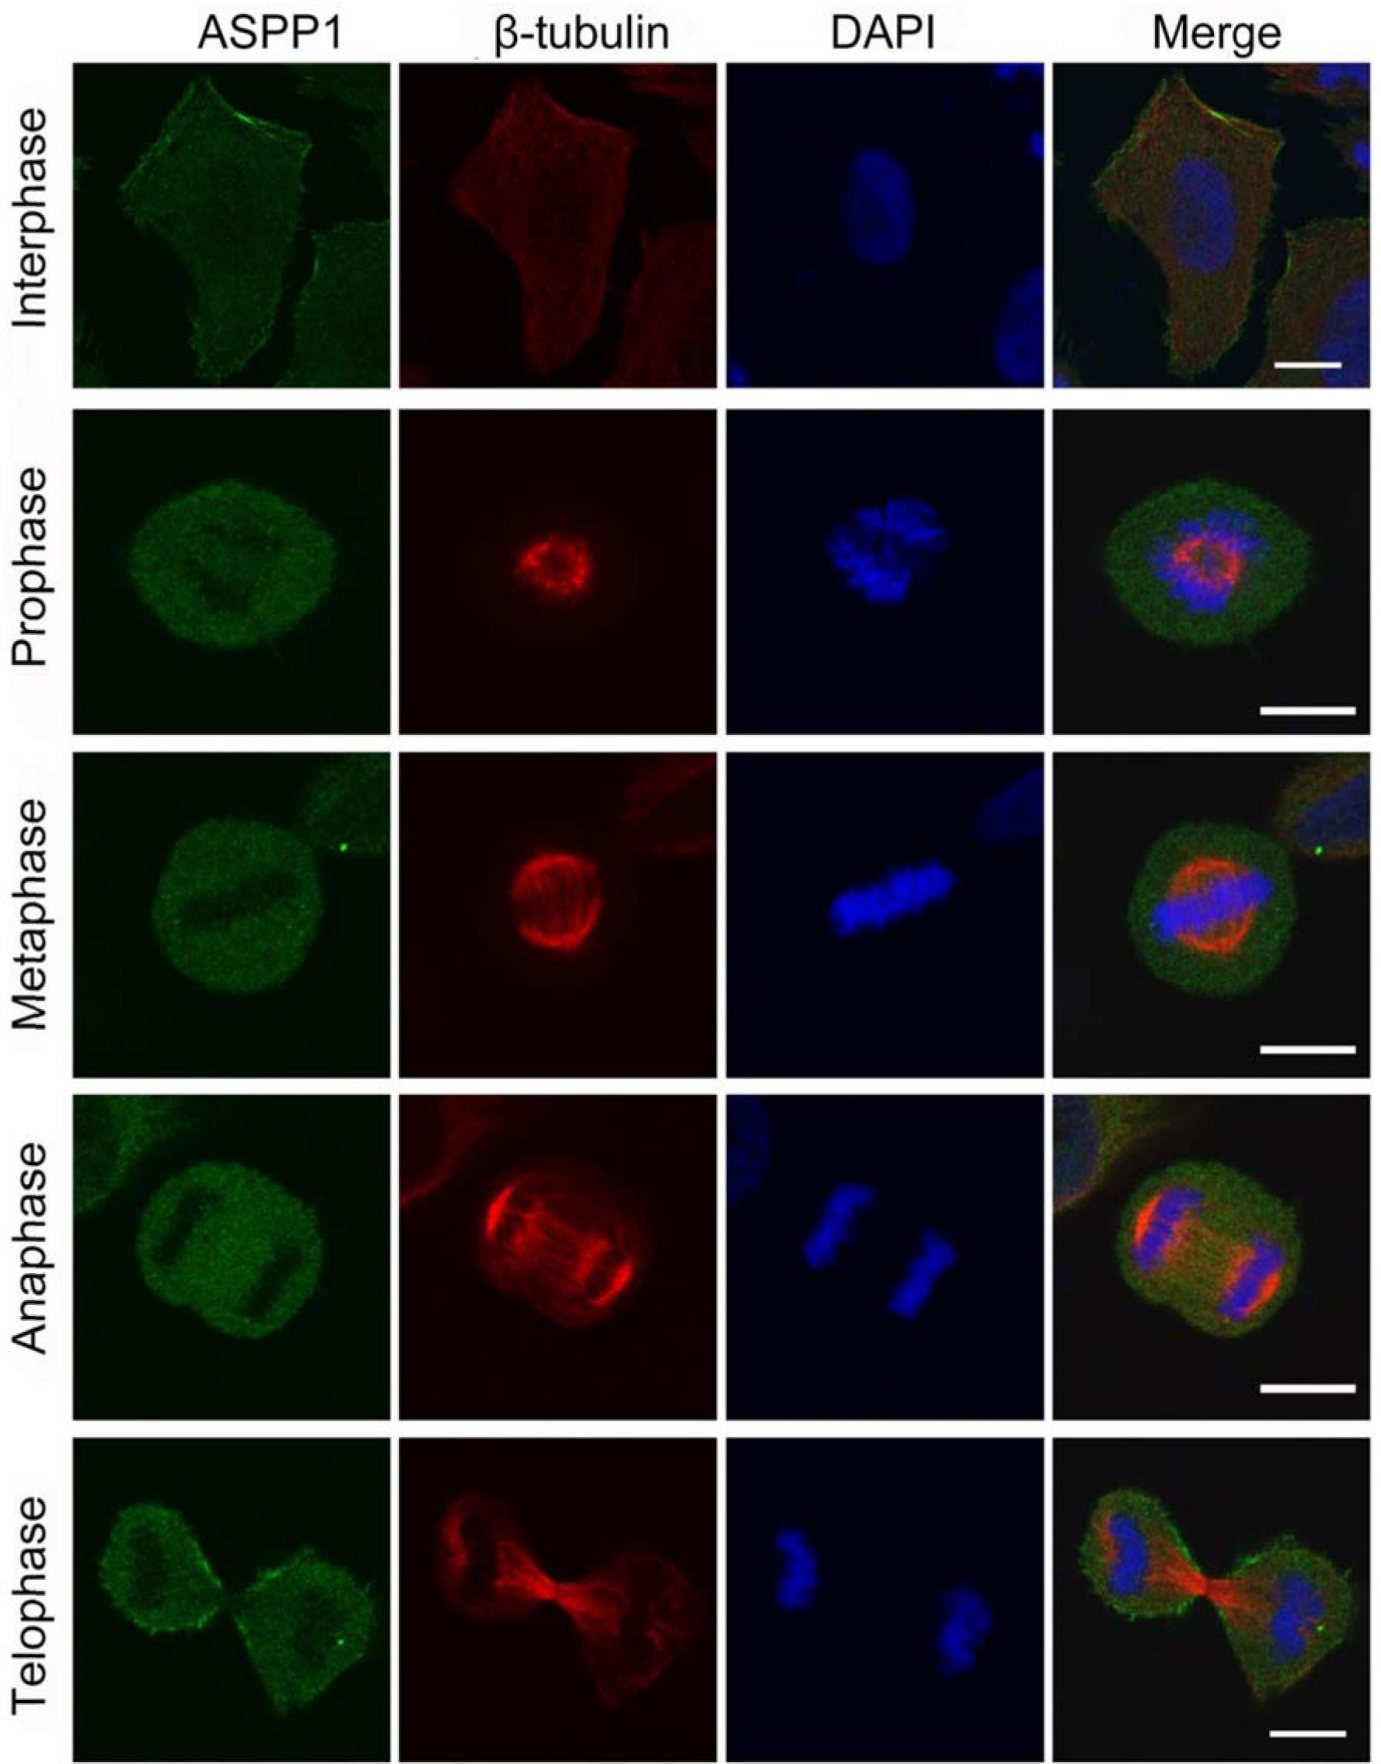

a

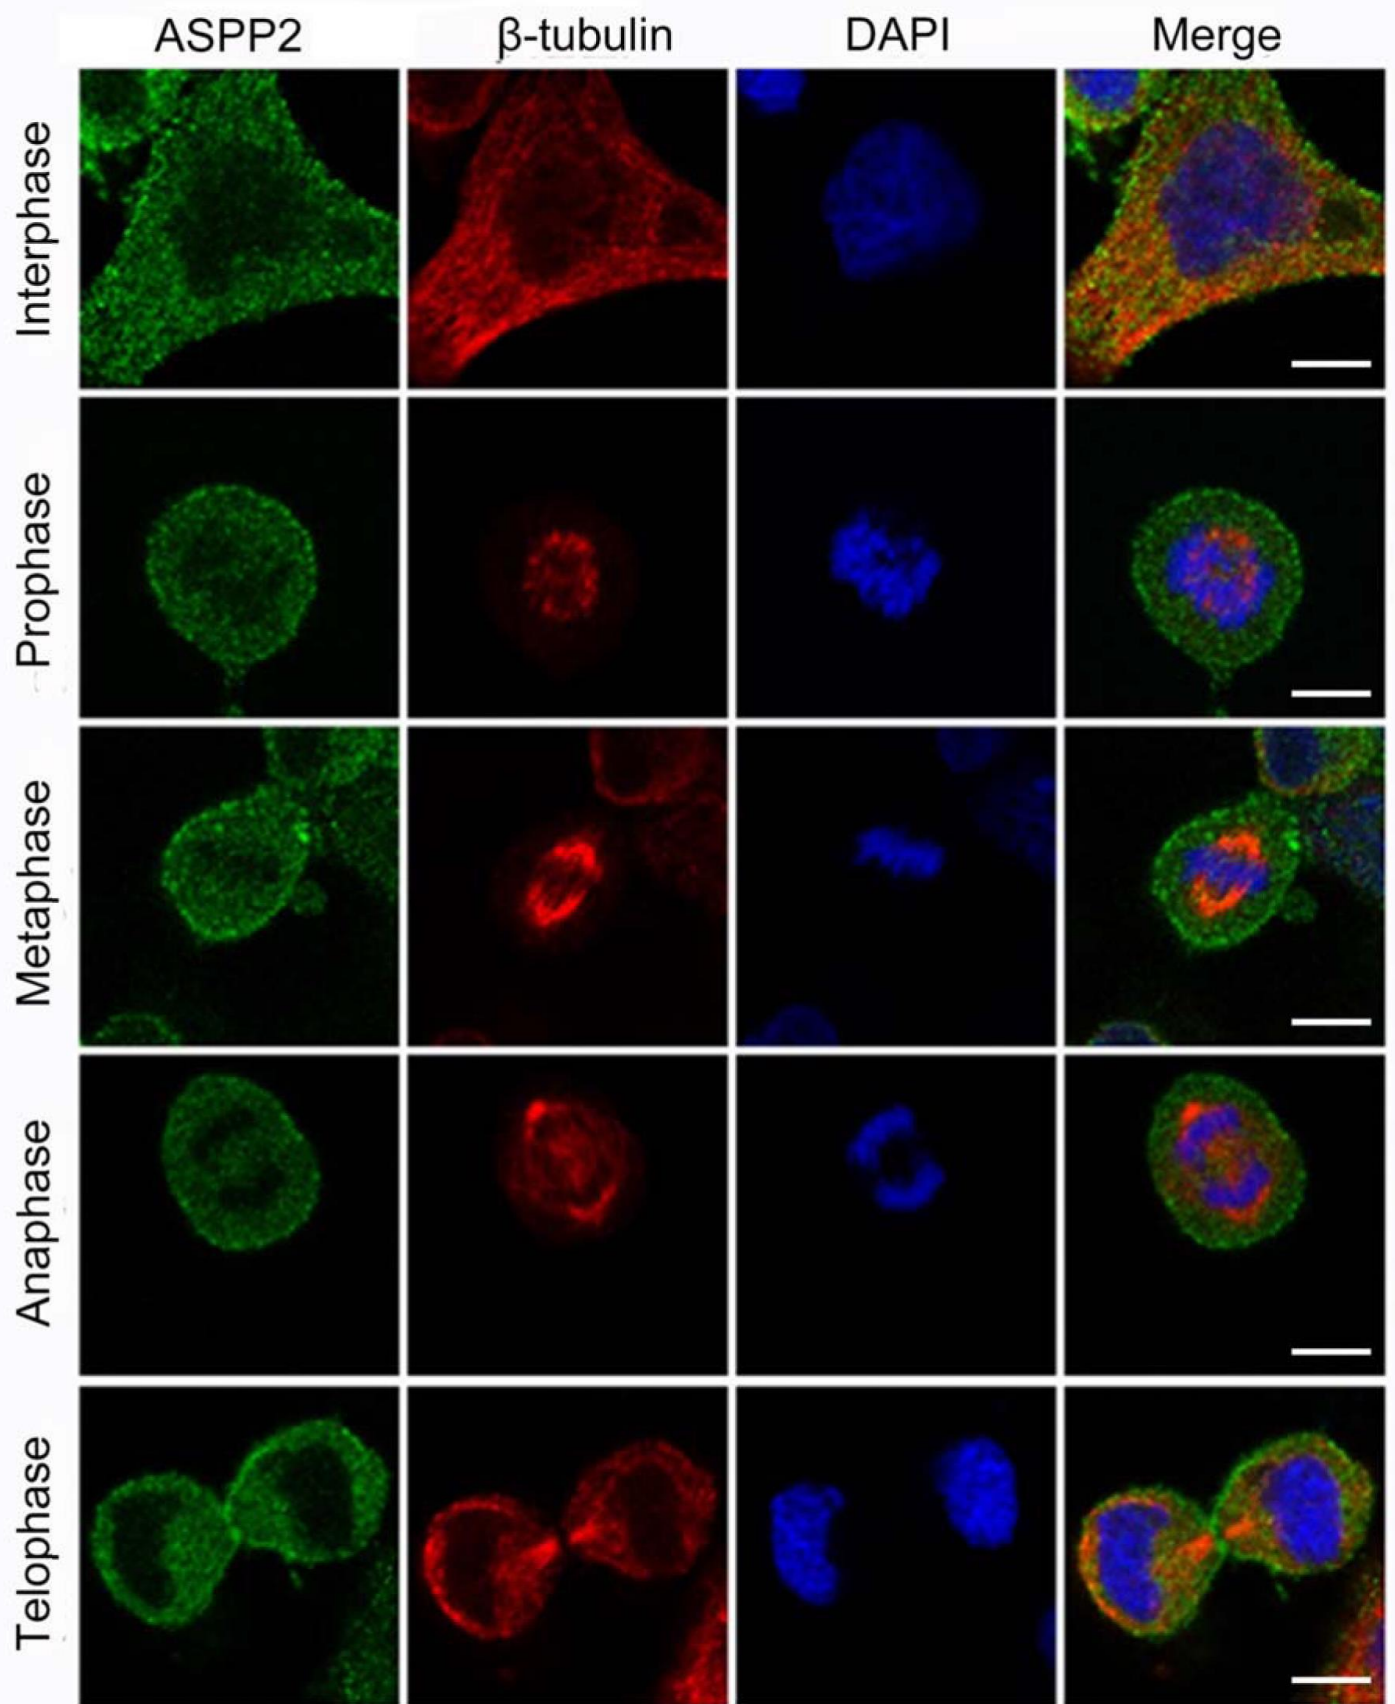

**b**

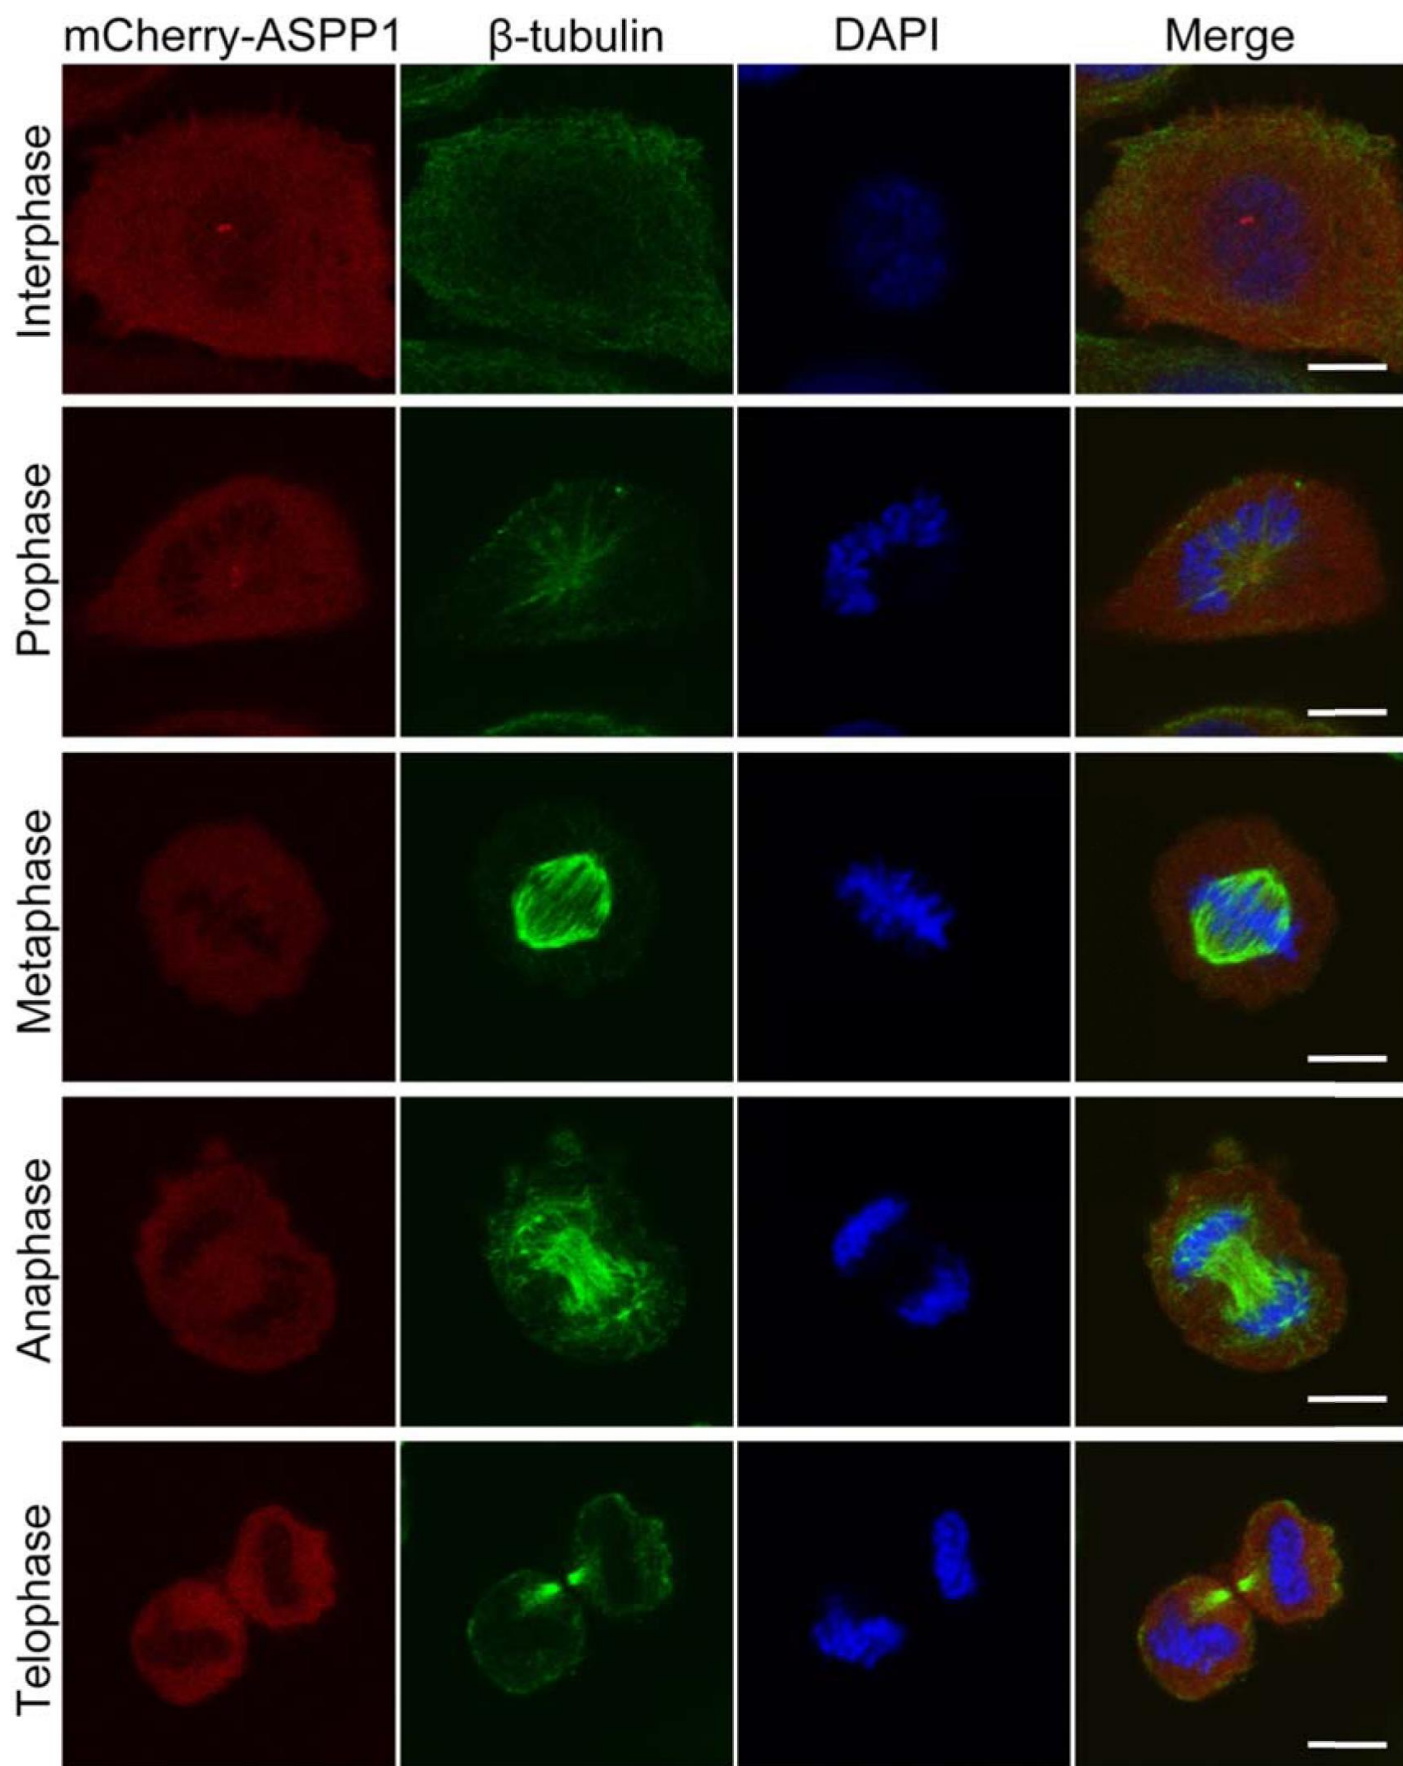

C

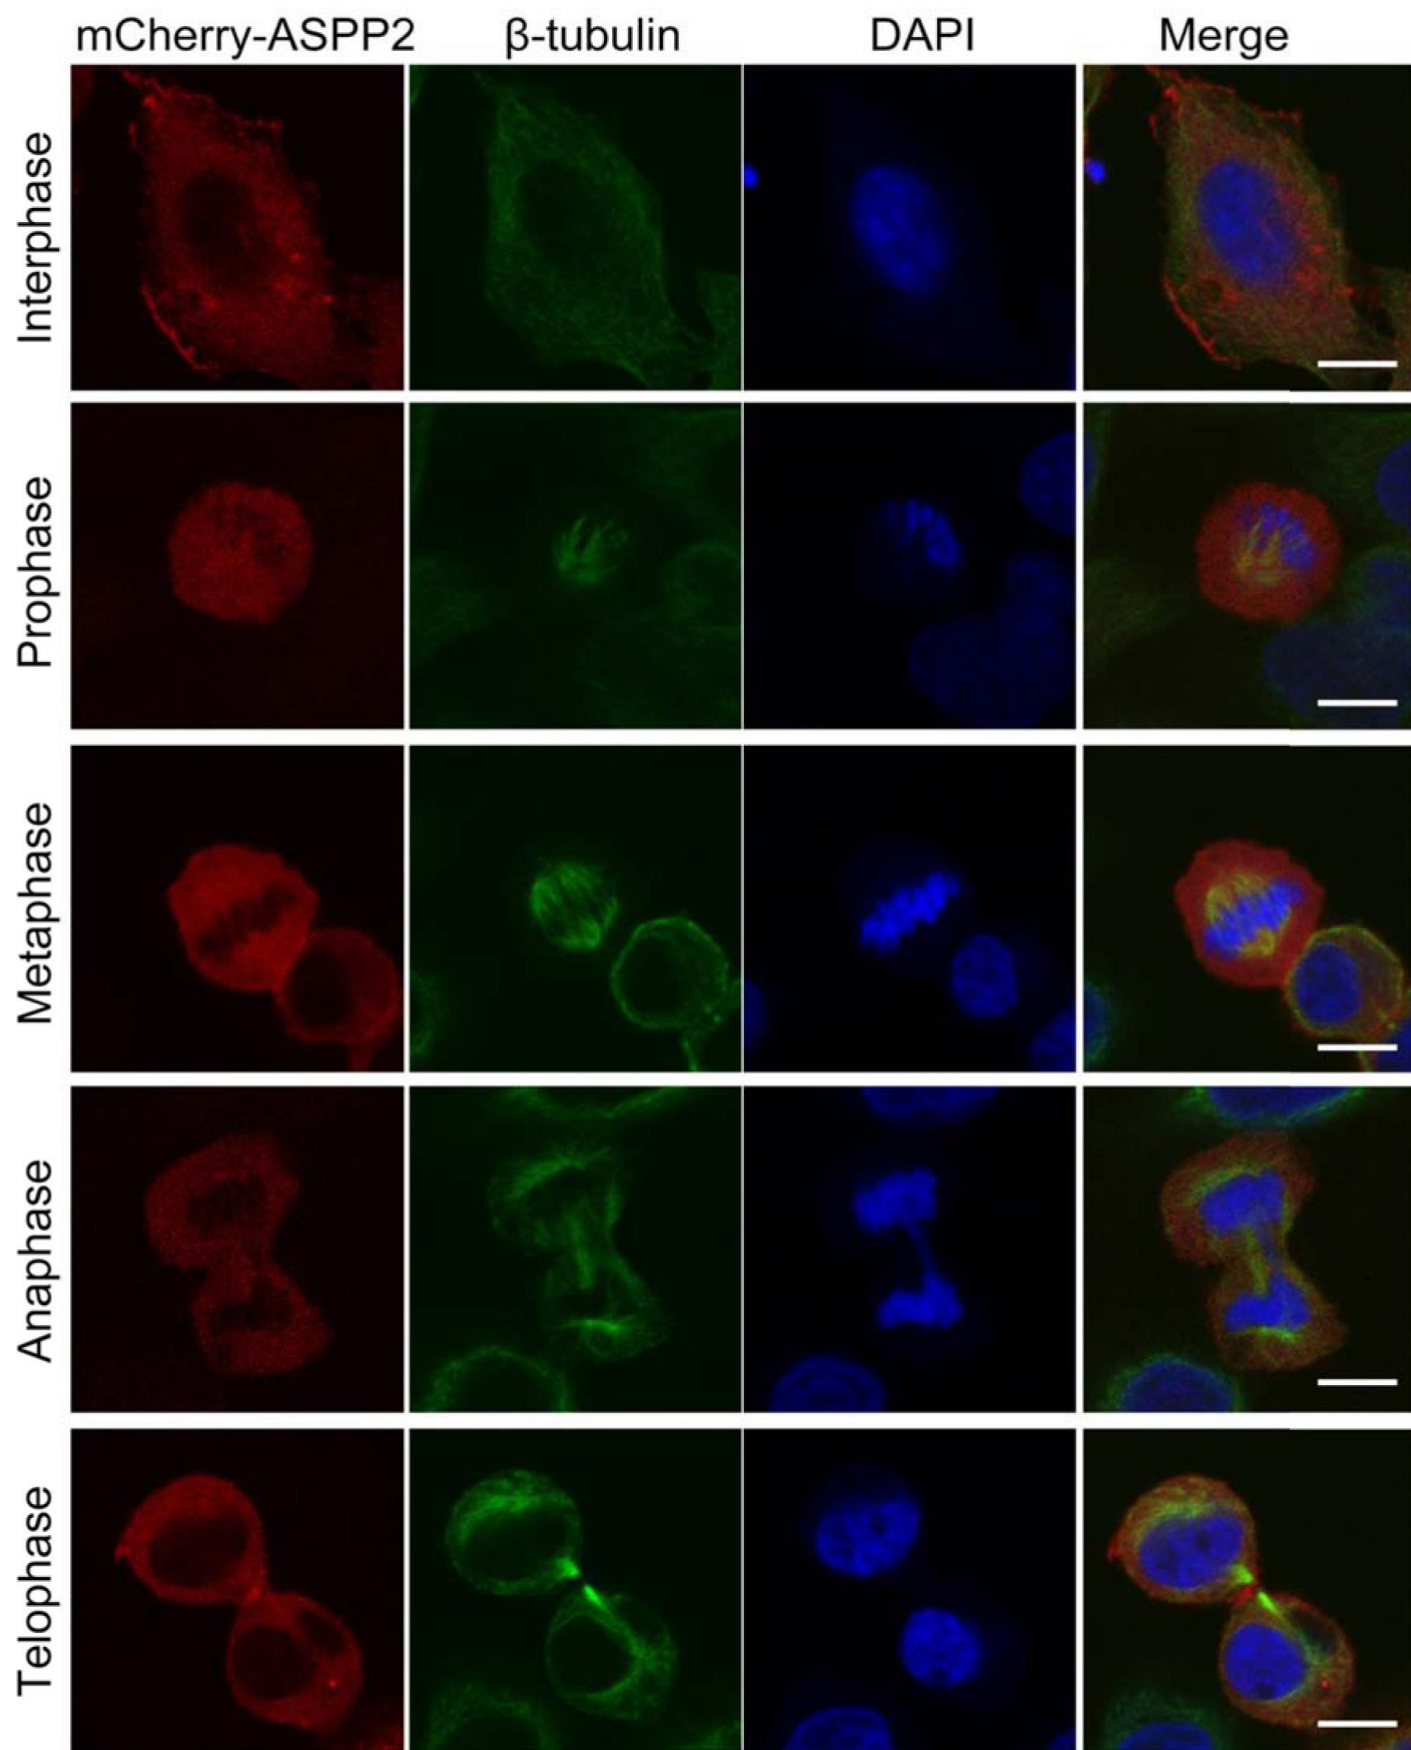

d

**Figure S2.** Subcellular localization of ASPP1/2 during mitosis. **(a, b)** HeLa cells were stained with anti-ASPP1 or ASPP2 (green), anti- $\beta$ -tubulin (red) antibodies and DAPI (blue). Scale bar = 10  $\mu$ m. **(c, d)** Localization of mCherry-tagged ASPP1 or ASPP2 transiently expressed in HeLa cells is shown. HeLa cells were stained with the anti- $\beta$ -tubulin (green) antibody and DAPI (blue). Scale bar = 10  $\mu$ m.



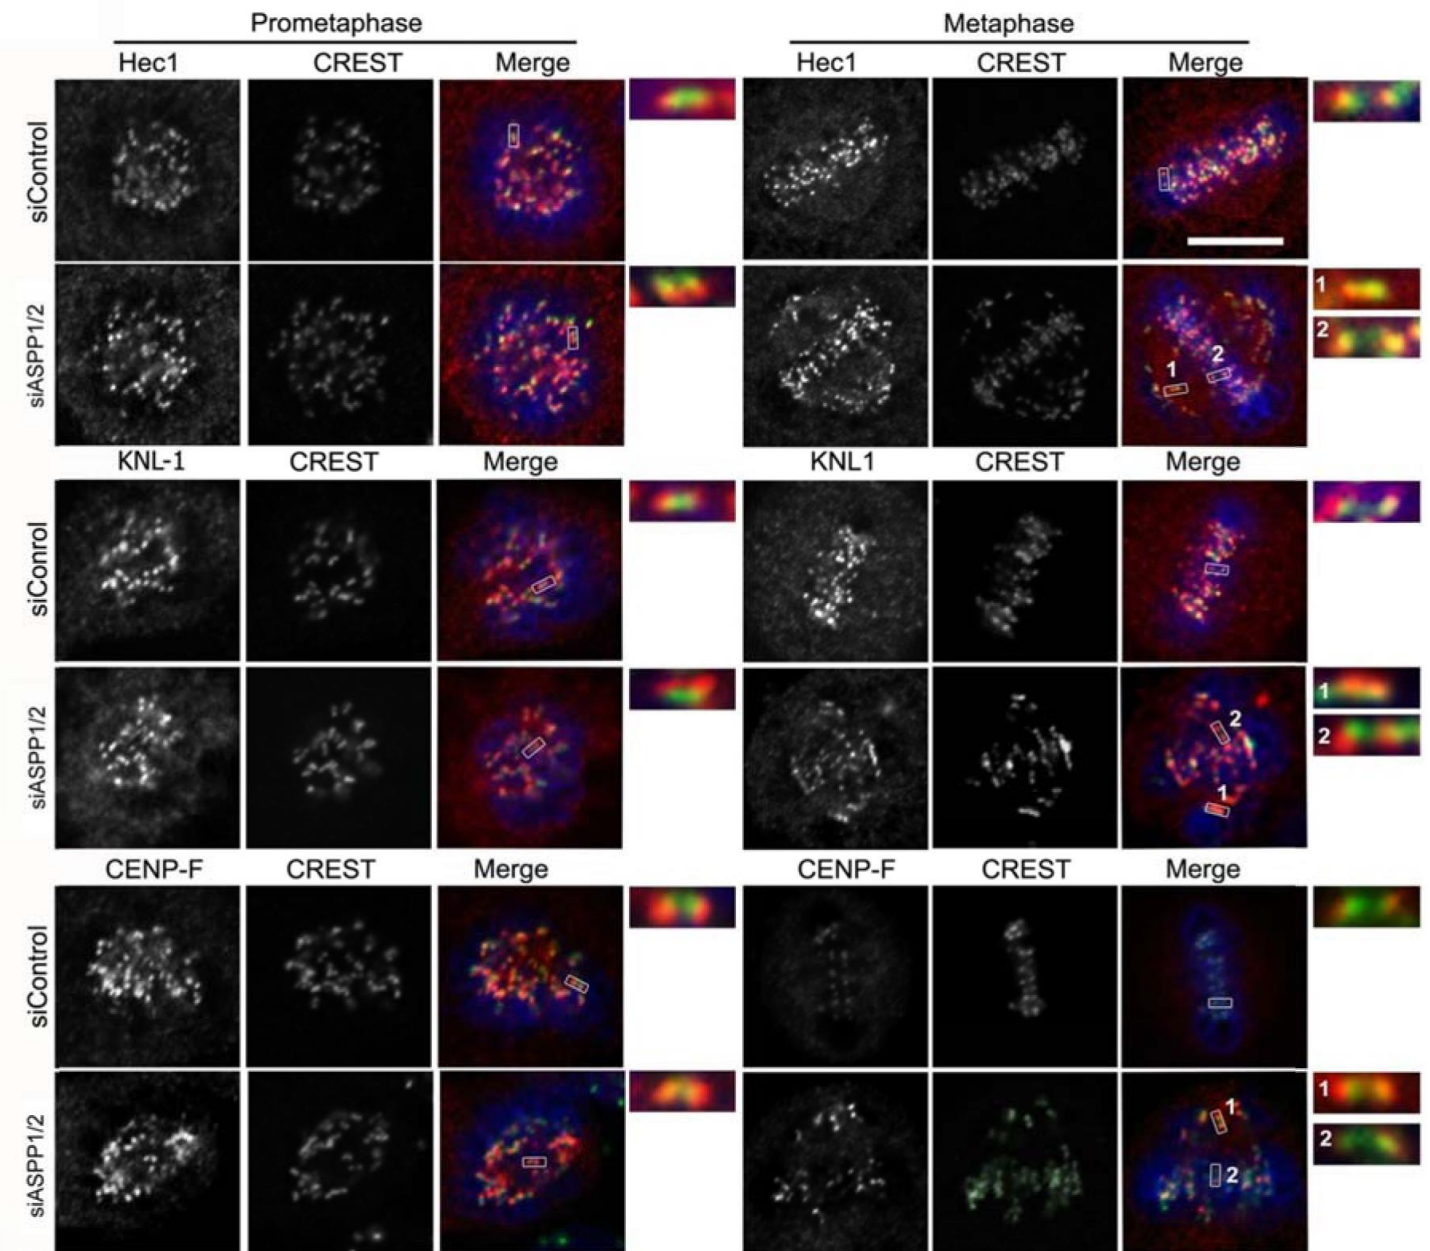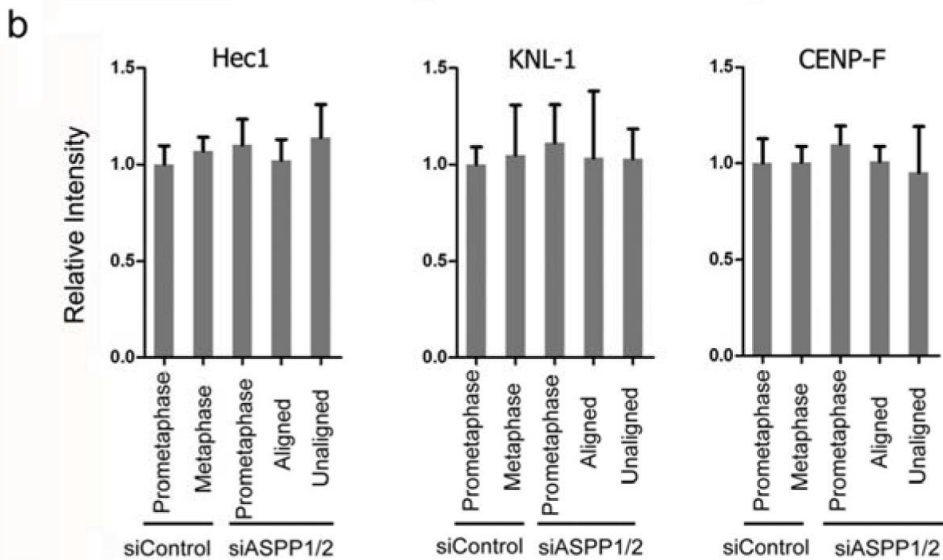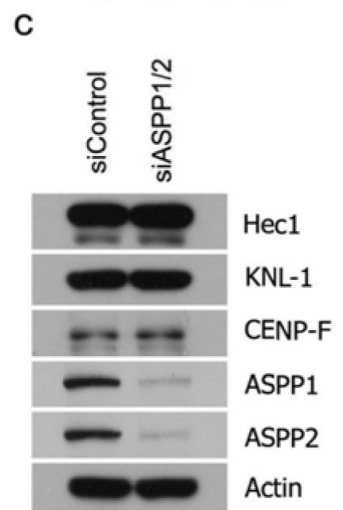



**Figure S3.** ASPP1/2 co-depletion does not alter the kinetochore localization of Hec1, KNL-1 or CENP-F. **(a)** Hec1, KNL-1 or CENP-F localization in ASPP1/2 co-depleted HeLa cells. HeLa cells were transfected with control or ASPP1/2 siRNAs for 48 hr, and with nocodazole for 12 hr and then released into fresh media for 1-2 hr before fixation. Cells were stained for the antibodies against the indicated Hec1, KNL-1 or CENP-F (red), together with kinetochores (CREST, green) and DNA (blue). The figures show confocal images of cells at prometaphase and metaphase. Insets are magnified images of the boxed areas. Scale bar = 10  $\mu$ m. **(b)** Quantification of the fluorescence intensity of the Hec1, KNL-1 or CENP-F of normalized to the fluorescence intensity of CREST staining are shown. For quantifications, ~30 mitotic cells were measured for each experiment and condition. **(c)** WB analyses of cell lysates prepared from control and ASPP1/2 co-depleted HeLa cells with the indicated antibodies.

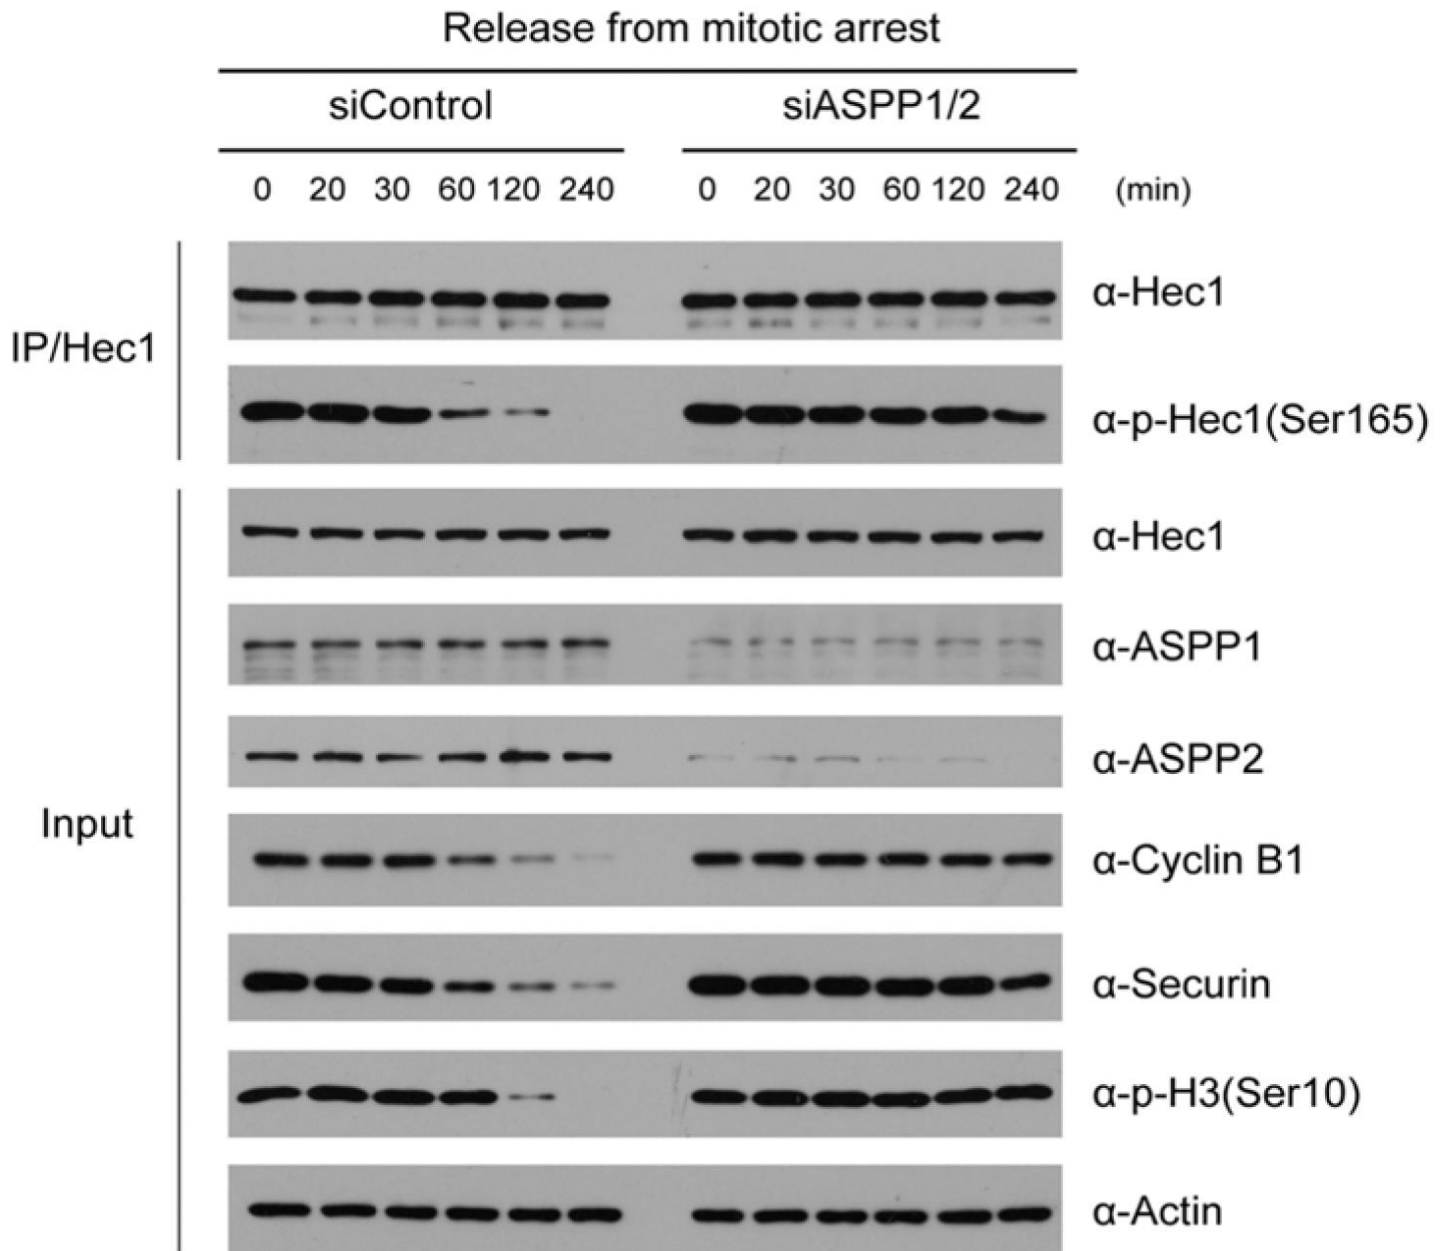

**Figure S4.** ASPP1/2 co-depletion causes prolonged mitotic exit. HeLa cells were transfected with control or ASPP1/2 siRNAs. After 24 hr, HeLa cells were arrested in prometaphase by a sequential thymidine-nocodazole block and shake off (0 min), or released from a prometaphase arrest by incubation in free media for the indicated times (20-240 min). The cell lysates were prepared for immunoprecipitation with anti-Hec1 antibody and WB analyses with indicated antibodies.
